# Supplementary material for: Allele-specific methylation is prevalent and is contributed by CpG-SNPs in the human genome
Source: HighWire-hosted journal article supplement (doi:10.1101/gr.104695.109), 2010-04-23
Supplement: GR-104695_SupplementaryInformation.pdf [file GR-104695_SupplementaryInformation.pdf]

**Supplementary Figure 1.** The workflow of methylation haplotype analysis.

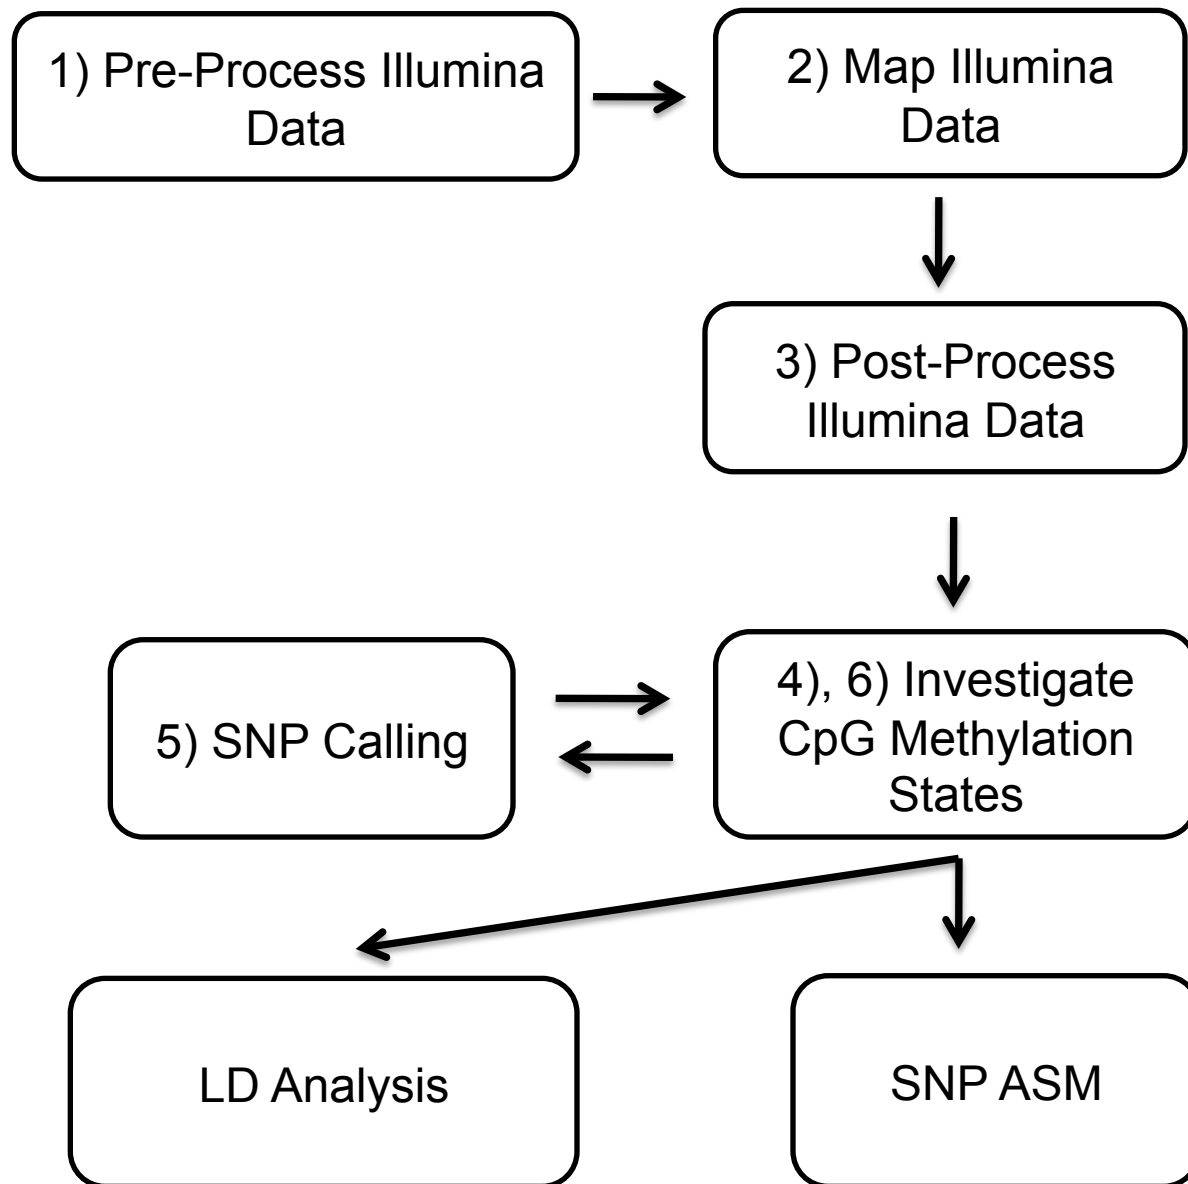

**Supplementary Figure 1. The workflow of data analysis contains the following steps:** 1) Pre-processing of Illumina data involved detecting whether the read was a PCR product or bisulfite converted sequence and taking the reverse complement of PCR product sequences. Then the read sequences were demethylated *in silico*. 2) Reads were mapped to the unmethylated bisulfite converted hg18 reference genome. 3) Reads that did not uniquely map to the reference are filtered out. Paired end reads that mapped too closely together or too far away were treated as single end reads. 4) The read coordinates of the mapped *in silico* demethylated reads were assigned to the read's original sequence. The methylated state of any known CpGs covered by the reads were investigated. 5) SNPs were called based on the mapped read data using our own algorithm and SAM Tools. The intersection of SNP calls from these two algorithms was used in further analyses. 6) The methylation states of new CpGs created by SNPs were investigated. 7) The methylation information was used for LD and SNP ASM analyses.

**Supplementary Figure 2.** Methylation frequency histograms for CpG dinucleotides located in chromosome X.

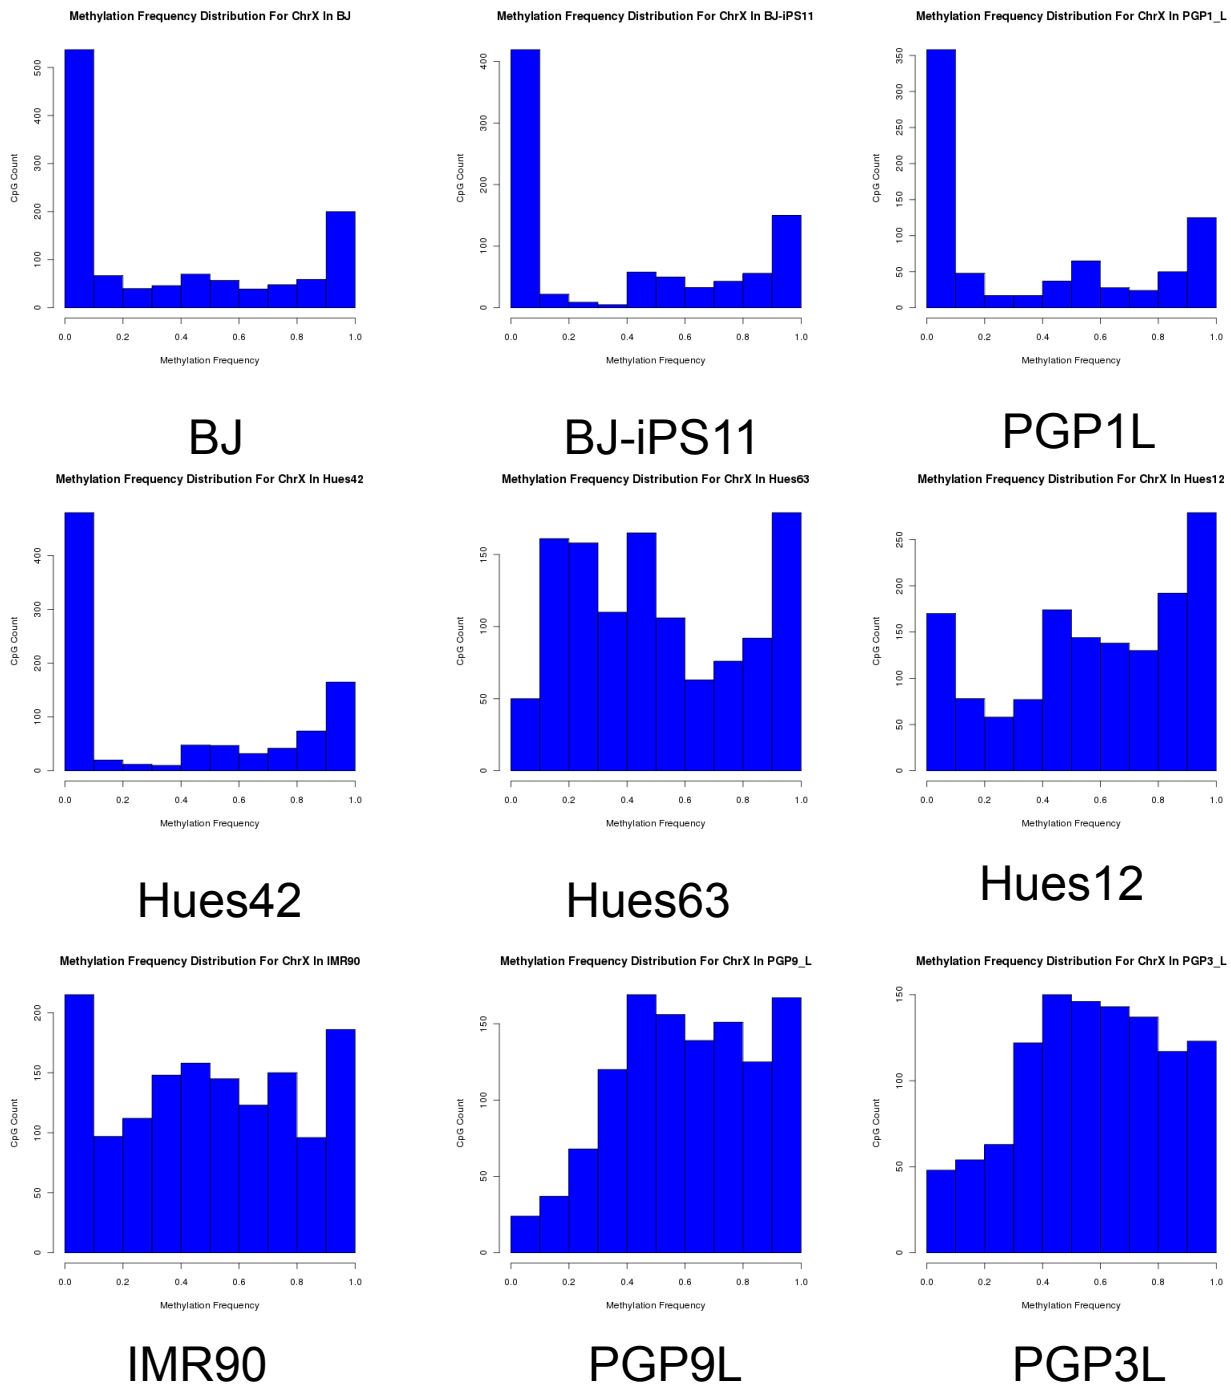

**Supplementary Figure 2.** Methylation frequency histograms for CpG dinucleotides located in chromosome X. The X-axis represents the methylation frequency bins and the y-axis represents the number of CpG dinucleotides within a certain methylation frequency bin. A methylation frequency value of one represents complete methylation at a CpG. Hues63, a male cell line, has a methylation frequency distribution in chromosome X that visibly contains more fuzzily methylated probes ( $.25 < \text{methylation frequency} < .75$ ) than other male cell lines. Fuzzily methylated probes in chromosome X are indicative of female cell lines (Hues12, IMR90, PGP3L, PGP9L) rather than male cell lines (BJ family, Hues42, PGP1L), which is due to allele specific methylation.

**Supplementary Figure 3.** Linkage disequilibrium analysis of CpG methylation haplotypes.

**Probe Fraction  
Color Key**

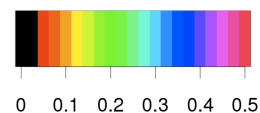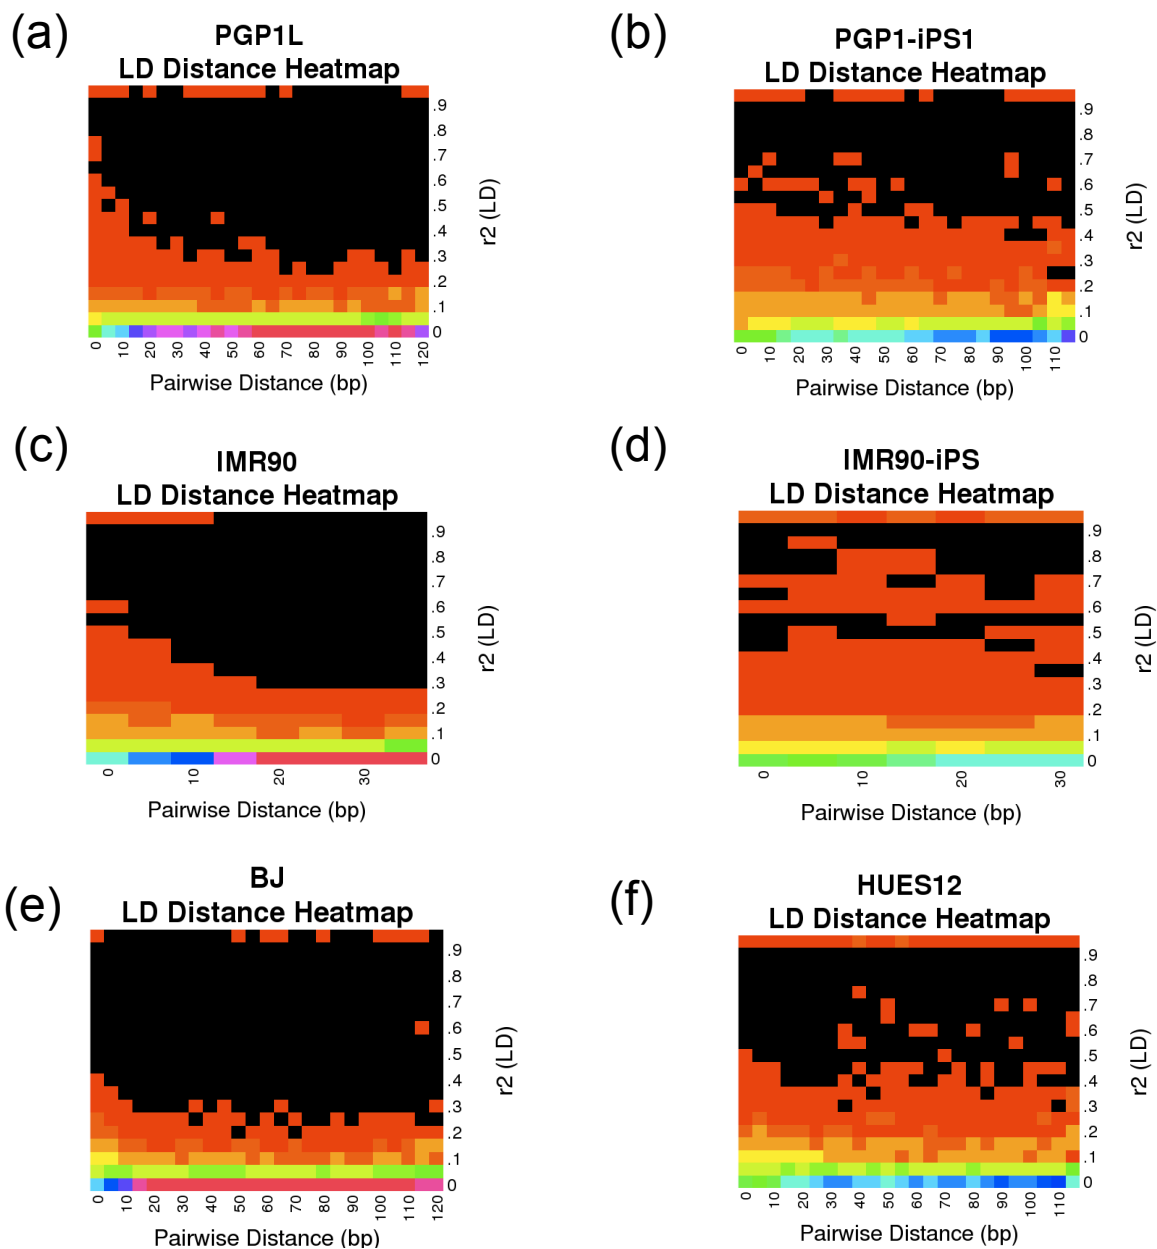

**Supplementary Figure 4.** Linkage disequilibrium analysis of CpG methylation haplotypes. (a), (c), and (e) are from differentiated cells and the heatmap shows that the  $r^2$  value distribution shifts downwards as pairwise distance increases. (b), (d), and (f) represent undifferentiated cells and the distribution of  $r^2$  values is maintained as pairwise distance increases. These figures show that undifferentiated cells contain organized methylation patterns that tend to span farther distances than in differentiated cells.

**Supplementary Figure 4. Cell type specificity and individual dependent of ASM.**

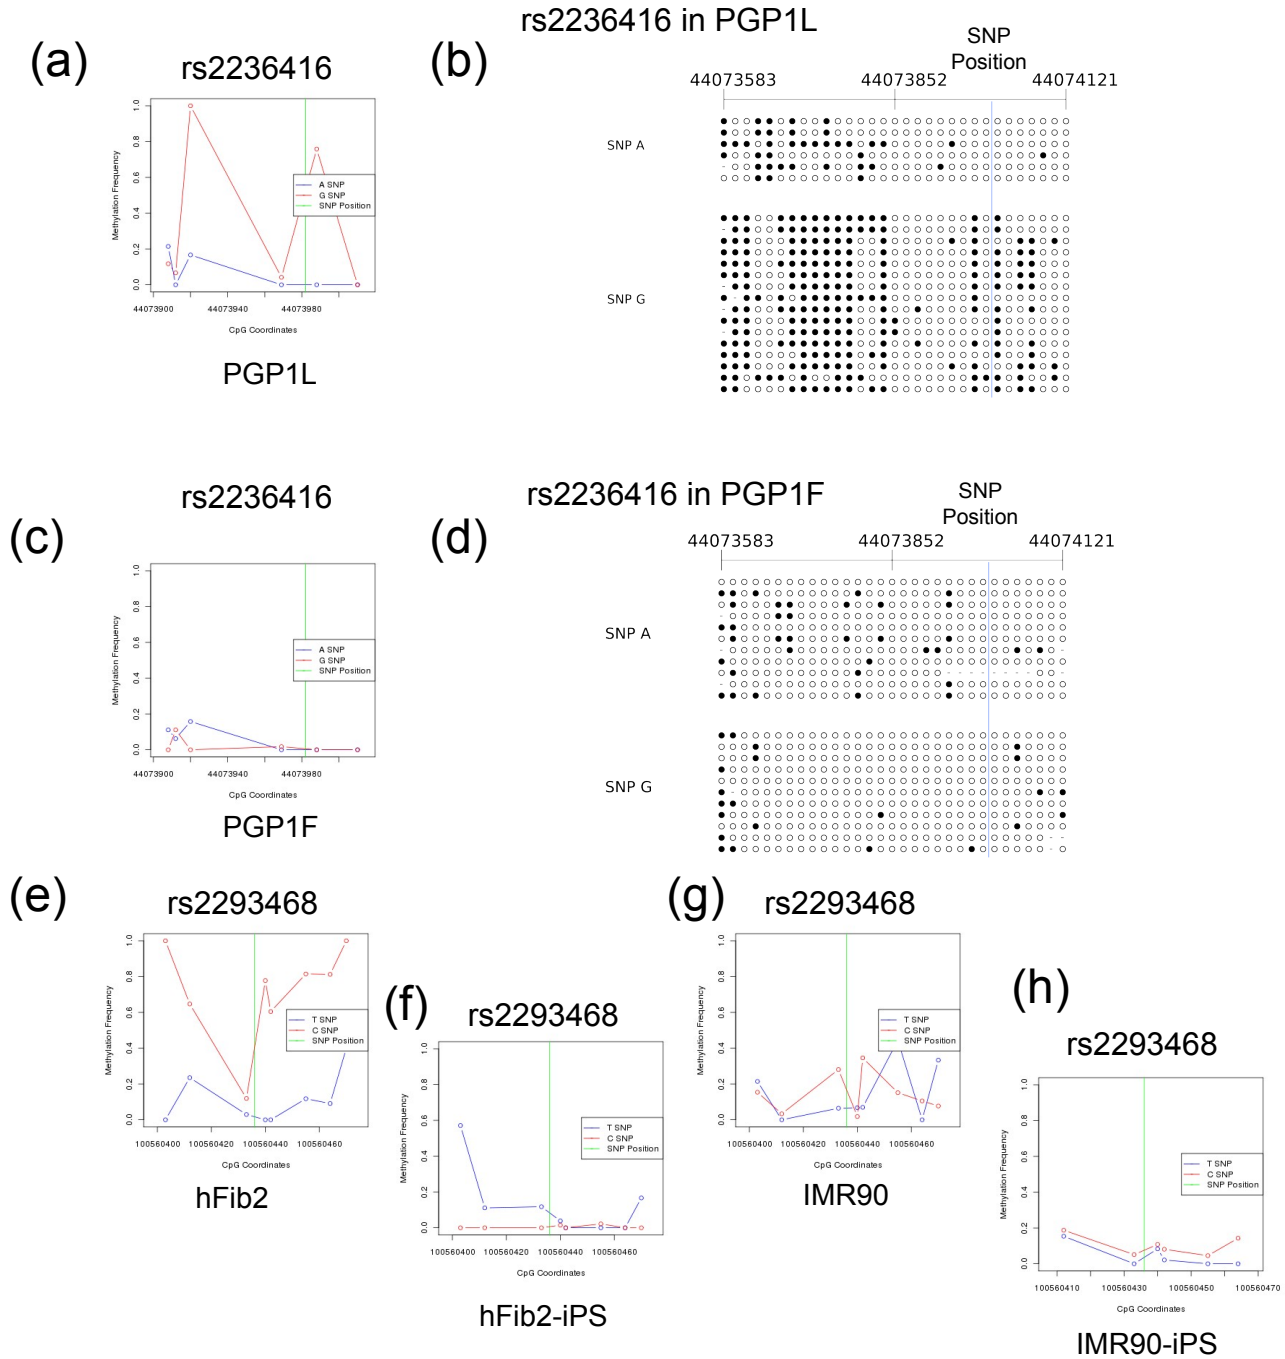

**Supplementary Figure 6. Cell type specificity and individual dependence of ASM.** (a)-(d) Illumina and Sanger sequences from PGP1L and PGP1F showing cell type specificity of ASM in rs2236416 indexed region in the intron of MMP9 gene (chr20:44073908-44074010 in Illumina and chr20:44073583-44074121 in Sanger data). ASM is seen in PGP1L near rs2236416 but not seen in PGP1F. (e)-(h) Illumina reads from hFib2, IMR90, hFib2-iPS (chr12:100560403-100560470) and IMR90-iPS (chr12:100560412-100560464) show the cell type specificity of ASM in rs2293468 indexed region. ASM around SNP rs2293468 is seen in hFib2, hFib2-iPS, and IMR90 but not IMR90-iPS.

**Supplementary Figure 5. ASM example in PGP3L.**

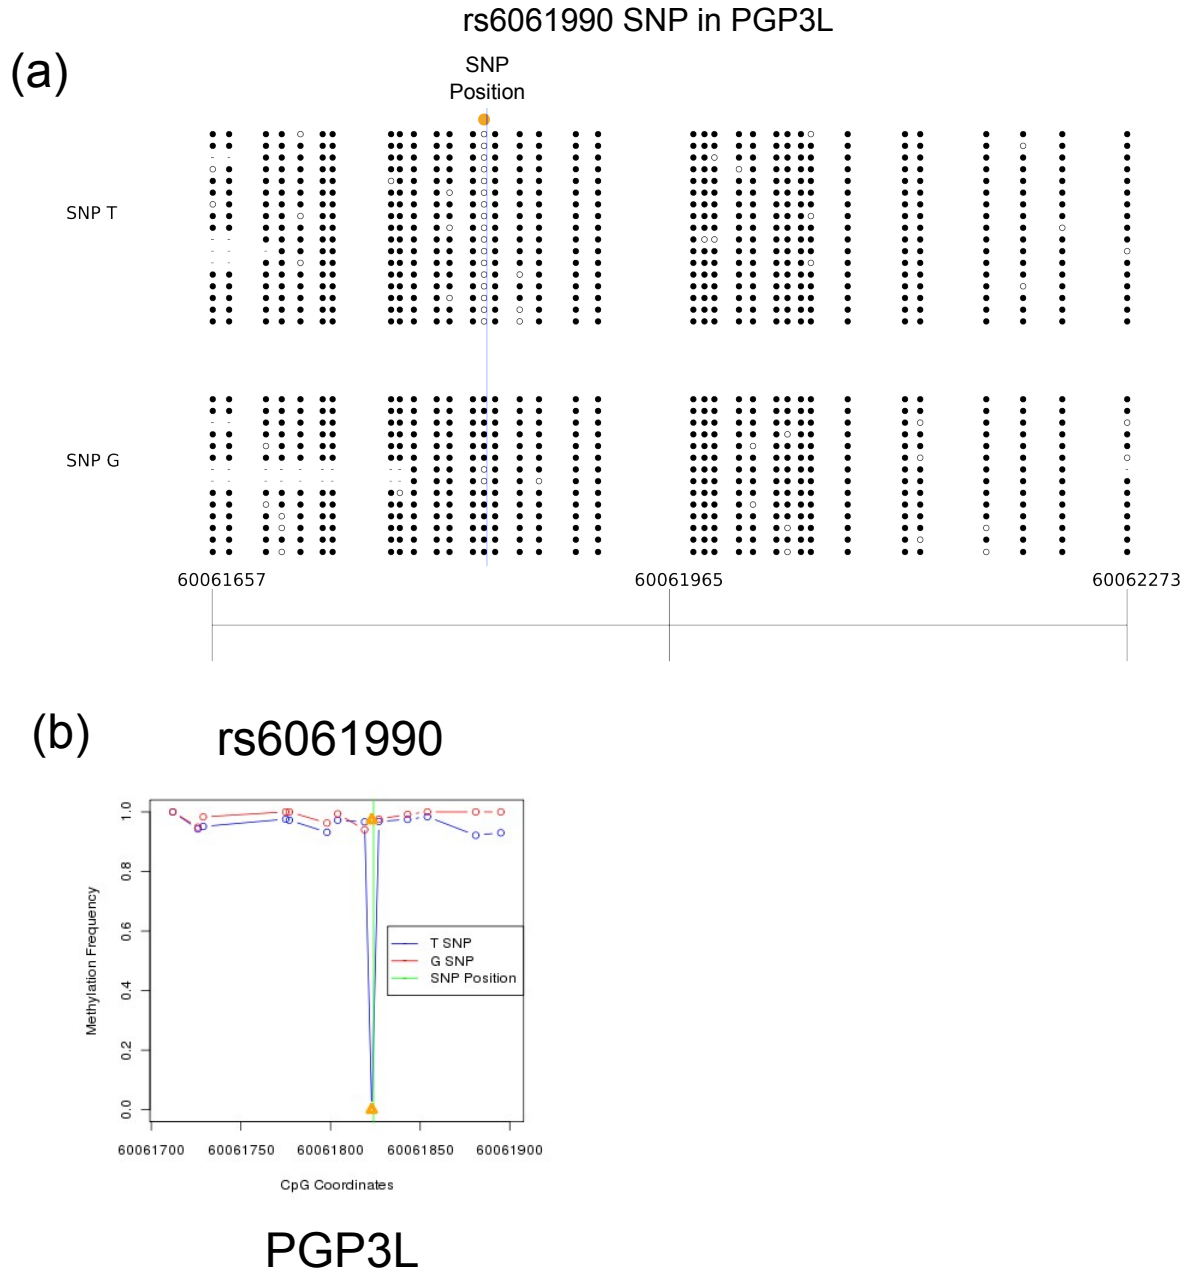

**Supplementary Figure 5.** ASM example in PGP3L. (a) Sanger reads from PGP3L show ASM at a CpG dinucleotide that overlaps with SNP rs6061990 (chr20:60061657-60062273). The other CpG dinucleotides do not show ASM. (b) Methylation frequency diagram of the SNP rs6061990 region produced by Illumina data (chr20:60061712-60061895). The diagram supports the ASM behavior observed in the Sanger sequences. The orange triangles represent a SNP site that overlaps with a CpG. There is a difference in methylation frequency at coordinate 60061798 but it is not considered significant due to low read depth; only 6 mapped Illumina reads of the G allele cover this CpG dinucleotide.

**Supplementary Figure 6.** Linkage disequilibrium analysis of CpG methylation haplotypes in SNP indexed region rs3746459 (NECAB3 Intron) in BJ-iPS11.

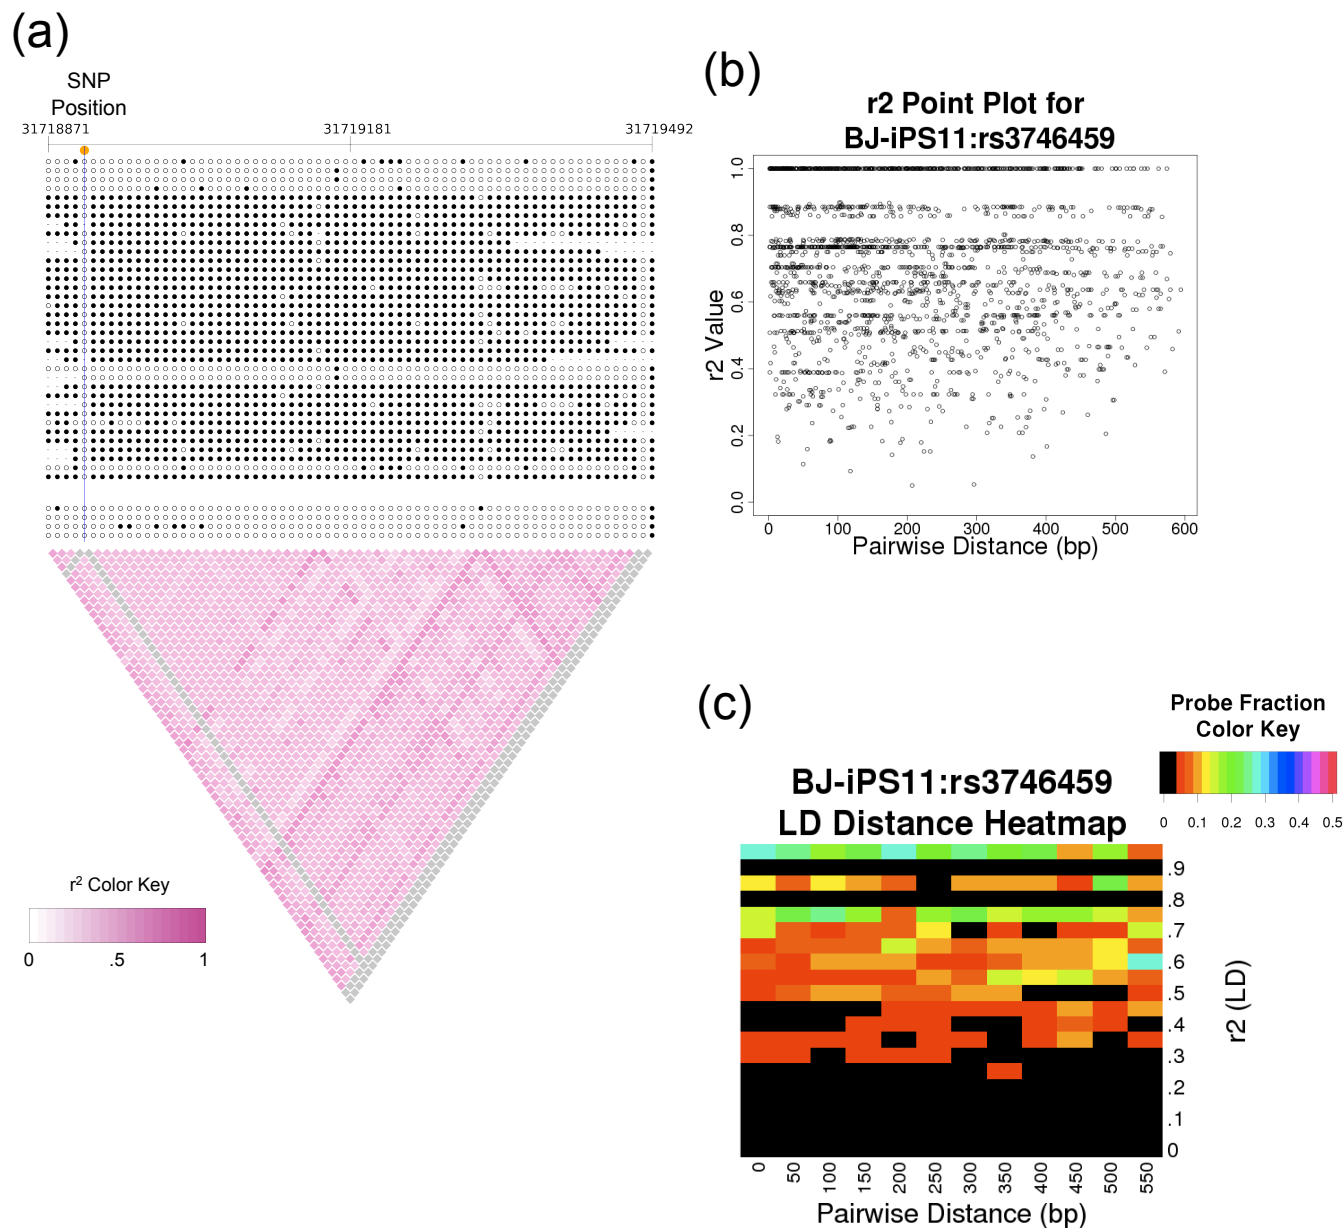

**Supplementary Figure 3.** Linkage disequilibrium analysis of CpG methylation haplotypes around rs3746459 in BJ-iPS12 (chr20:31718871-31719492). (a) Sanger shows sequences that are either mostly methylated or unmethylated. In this case, the T SNP allele destroys the CpG dinucleotide and CpGs at this location on the T allele are thusly unmethylated. The methylation organization shows characteristics of ASM but the SNP identity at rs3746459 does not clearly separate the methylated and unmethylated sequences. (b) and (c) CpG pairwise  $r^2$  value plots and heatmap show that the  $r^2$  values in this region are significant and maintain significance as the relative distance between the two CpG dinucleotides increases.

**Supplementary Figure 7.** Examples of ASM flipping.

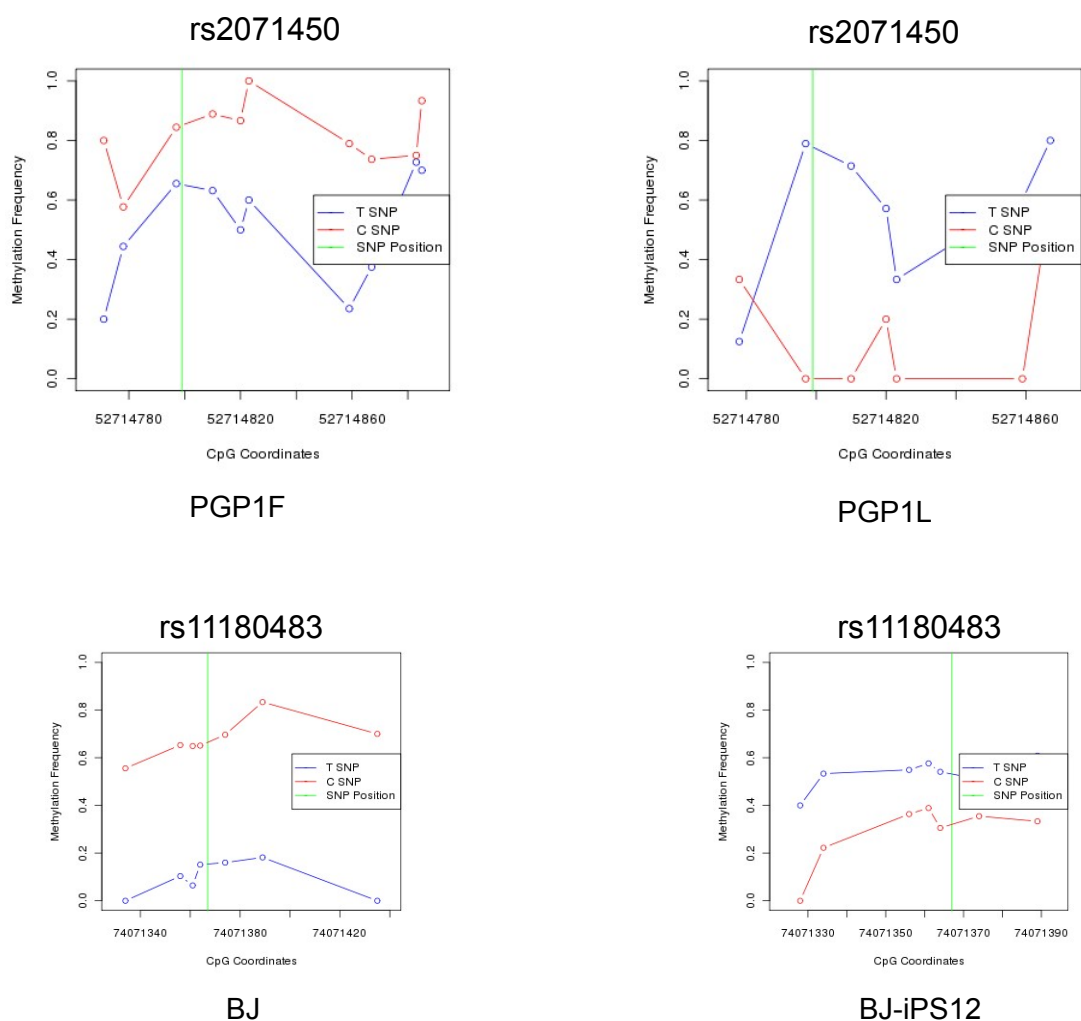

**Supplementary Figure 7.** Examples of ASM flipping. (a) and (b) Illumina reads from PGP1F and PGP1L show ASM in SNP rs2071450 region (chr12:52714771-52714885). The G allele is predominantly more methylated than A allele in PGP1F whereas A allele is more methylated than G allele in PGP1L. (c) and (d) Illumina reads from BJ (chr12:74071334-74071435) and BJ-iPS12 (chr12:74071328-74071389) show ASM around SNP rs11180483 indexed region. C allele is predominantly more methylated than T allele in BJ whereas T allele is more methylated than C allele in BJ-iPS12.

**Supplementary Table 1. SNPs and ASM by Sanger sequencing.**

| Cell Line | SNP 129 ID | Associated Ref Seq Genes | Sequenced Strand | Minimum Allele Read Depth | Sanger ASM Class | Illumina ASM Class |
|-----------|------------|--------------------------|------------------|---------------------------|------------------|--------------------|
| BJ        | rs3746459  | NECAB3:intron            | -                | 1                         | III              | III                |
| BJ        | rs7266947  |                          | +                | 7                         | I                | I                  |
| BJ-iPS11  | rs10877897 |                          | +                | 46                        | I                | I                  |
| BJ-iPS11  | rs1061726  |                          | +                | 6                         | I                | III                |
| BJ-iPS11  | rs3746459  | NECAB3:intron            | -                | 4                         | I                | I                  |
| BJ-iPS12  | rs10846023 | FLJ22662:intron          | -                | 9                         | I                | I                  |
| hFib2     | rs2277324  | SLC26A10:5 prime         | +                | 0                         | NA               | I                  |
| Hues42    | rs2277324  | SLC26A10:5 prime         | +                | 2                         | III              | III                |
| Hues63    | rs220030   | SNRPN:intron             | -                | 0                         | NA               | III                |
| IMR90-iPS | rs2018002  | DNMT3B:intron            | +                | 2                         | III              | III                |
| IMR90-iPS | rs2089908  | LSP1:5 prime             | +                | 8                         | I                | II                 |
| PGP1F     | rs2236416  | MMP9:intron              | +                | 11                        | III              | III                |
| PGP1F     | rs2089908  | LSP1:5 prime             | +                | 7                         | III              | II                 |
| PGP1F     | rs2072788  | MATN4:exon               | -                | 12                        | III              | I                  |
| PGP1L     | rs2236416  | MMP9:intron              | +                | 6                         | I                | I                  |
| PGP1L     | rs2072788  | MATN4:exon               | -                | 8                         | I                | I                  |
| PGP1-iPS1 | rs2072788  | MATN4:exon               | -                | 11                        | III              | I                  |
| PGP3L     | rs6061990  | TAF4:intron              | +                | 14                        | II               | II                 |
| PGP3L     | rs2018002  | DNMT3B:intron            | +                | 1                         | III              | I                  |
| PGP9L     | rs6061990  | TAF4:intron              | +                | 13                        | II               | I                  |
| PGP9L     | rs2018002  | DNMT3B:intron            | +                | 4                         | III              | III                |

**Supplementary Table 1. SNPs and ASM by Sanger sequencing.** ASM statistics of the Sanger sequences compared to the Illumina read regions. Minimum allele read depth shows the minimum number of aligned Sanger sequences for either allele at each SNP region. The ASM categories were determined using the same criteria as for the Illumina sequences. Two called heterozygous SNPs in Hues63 and hFib2 from the Illumina data were not found in Sanger sequences. Illumina and Sanger ASM categories were considered consistent if both sequencing methods called ASM (i.e. category I or II). There were 7 cases where the ASM calls were not consistent between the Illumina and Sanger data. Rs2072788 in PGP1F and PGP1-iPS1 was a SNP that destroyed the cytosine of a CpG dinucleotide in one of the alleles in the Sanger sequences, which made this region ineligible for a category II ASM label. These two SNP regions were considered category I ASM in the Illumina data because of a neighboring CpG site that showed ASM. This corresponding CpG site in the Sanger data did not have sufficient read depth for a statistical call of ASM. Rs20889908 in PGP1F and rs2018002 in PGP3L also had insufficient Sanger read depth for ASM categorization. The discrepancy involving rs1061726 in BJ-iPS11 cannot be explained by read depth or single stranded coverage.



**Supplementary table 2.** Primer sequences.

| Index SNP  | Forward primer            | Reverse primer             | Amplicon size (bp) |
|------------|---------------------------|----------------------------|--------------------|
| rs1061726  | GTAGAAATTTGGAAGTGGAAATTT  | TAATCAATAATTTTTCCAAAAAAAAA | 645                |
| rs10846023 | TTTAGGGGTTGTTAGAGGGTTAGA  | AAATTTTAAAACCAACCCAACTC    | 674                |
| rs2018002  | GTTTTTGTTTTGGGAAAAGTTAAG  | CAAAAACAACTCAAATTCATACT    | 773                |
| rs2072788  | GTGAGGTTTTGTTGATTTAGGAGAG | ATCCAAACATTTAAATTAAAAATTC  | 671                |
| rs2089908  | AAGTTTTTGTTGGTTGGATTTTTTA | AAAAAAACCCATATTACCCCTAATC  | 746                |
| rs2236416  | TGGGTAAAGAATAGGATATATTTGG | AAAAAACCCAAAACCTTAAATAAAC  | 643                |
| rs3746459  | GAAGTTAGGAAATAGTGTGGAGT   | AATATACCCAAAACAATAACCC     | 640                |
| rs6061990  | AGGTTTGGGTATTTTATTTGTTTG  | ACTTTCCCAACTCTCAAACTCTAC   | 753                |
| rs2277324  | GGTTAAGGATGTTTGTAGAAA     | ATTAAACCTCTCACCTAAAACAC    | 557                |
| rs220030   | TAGGTTGTTTTTTGAGAGAAGTTAT | CTTTTAAAAAAATTTCAAATCTAAC  | 559                |
| rs10877897 | GAGATGATGGTTTGGATTTTTTAG  | AAAATCTTTAACCCTACCTACCC    | 615                |

**Supplementary Table 3.** Summary of Illumina Sequencing Data.

| Cell Line | Total Reads | Mapped Reads | % Mapped | Single End, Paired End, or Mixture. |
|-----------|-------------|--------------|----------|-------------------------------------|
| BJ        | 18,516,100  | 9,319,863    | 50.33%   | Mixture                             |
| BJ-iPS11  | 12,276,017  | 5,235,162    | 42.65%   | Single                              |
| BJ-iPS12  | 10,539,126  | 4,587,661    | 43.53%   | Single                              |
| hFib2     | 14,408,007  | 5,780,509    | 40.12%   | Single                              |
| hFib2-iPS | 14,805,000  | 5,652,624    | 38.18%   | Single                              |
| Hues12    | 18,764,749  | 8,849,367    | 47.16%   | Mixture                             |
| Hues42    | 11,185,368  | 6,378,978    | 57.03%   | Single                              |
| Hues63    | 14,315,301  | 5,811,519    | 40.60%   | Single                              |
| Hybrid1   | 16,522,597  | 9,093,421    | 55.04%   | Mixture                             |
| IMR90     | 24,687,802  | 10,493,117   | 42.50%   | Single                              |
| IMR90-iPS | 10,985,469  | 5,445,173    | 49.57%   | Single                              |
| PGP1F     | 8,441,376   | 5,021,880    | 59.49%   | Paired                              |
| PGP1-iPS1 | 5,617,832   | 3,611,457    | 64.29%   | Paired                              |
| PGP1L     | 5,258,188   | 3,704,072    | 70.44%   | Paired                              |
| PGP3L     | 5,286,442   | 3,481,123    | 65.85%   | Paired                              |
| PGP9L     | 5,689,552   | 4,121,764    | 72.44%   | Paired                              |

**Supplementary Table 3.** Summary of Illumina sequencing data. Single end data is taken from the previously published data set and the paired end data is from new experiments. Cell lines labeled as a mixture of reads contain single end and paired end Illumina sequences, which were merged together before alignment.

**Supplementary Table 4.** Genes with Conserved LD Blocks across 12 or more Cell Lines.

| Gene                | Cell Lines With LD Block | Cell Lines                                                                           |
|---------------------|--------------------------|--------------------------------------------------------------------------------------|
| <b>FRG1B</b>        | 16                       | P1F,P1iPS11,IMR90,IMR90iPS,H12,BJ,P9L,H63,H42,Hy,BjiPS12,P3L,hFib2,P1L,BjiPS11,hFiPS |
| <b>HM13</b>         | 16                       | P1F,P1iPS11,IMR90,IMR90iPS,H12,BJ,P9L,H63,H42,Hy,BjiPS12,P3L,hFib2,P1L,BjiPS11,hFiPS |
| <b>NR_003579</b>    | 16                       | P1F,P1iPS11,IMR90,IMR90iPS,H12,BJ,P9L,H63,H42,Hy,BjiPS12,P3L,hFib2,P1L,BjiPS11,hFiPS |
| <b>GNAS</b>         | 16                       | P1F,P1iPS11,IMR90,IMR90iPS,H12,BJ,P9L,H63,H42,Hy,BjiPS12,P3L,hFib2,P1L,BjiPS11,hFiPS |
| <b>SNRPN</b>        | 16                       | P1F,P1iPS11,IMR90,IMR90iPS,H12,BJ,P9L,H63,H42,Hy,BjiPS12,P3L,hFib2,P1L,BjiPS11,hFiPS |
| <b>KCNS1</b>        | 14                       | P1F,P1iPS11,IMR90iPS,H12,P9L,H63,H42,Hy,BjiPS12,P3L,hFib2,P1L,BjiPS11,hFiPS          |
| <b>KCNK15</b>       | 13                       | P1F,P1iPS11,IMR90,IMR90iPS,H12,BJ,P9L,Hy,BjiPS12,P3L,hFib2,hFiPS,P1L                 |
| <b>NR_003531</b>    | 13                       | P1F,P1iPS11,IMR90,H12,BJ,P9L,H63,H42,Hy,P3L,hFib2,hFiPS,P1L                          |
| <b>LOC100134868</b> | 13                       | P1F,P1iPS11,IMR90,IMR90iPS,H12,BJ,P9L,H63,H42,Hy,BjiPS12,P3L,BjiPS11                 |
| <b>MEG3</b>         | 13                       | P1F,P1iPS11,IMR90,H12,BJ,P9L,H63,H42,Hy,P3L,hFib2,hFiPS,P1L                          |
| <b>NNAT</b>         | 13                       | P1F,IMR90,IMR90iPS,H12,BJ,P9L,H63,H42,Hy,BjiPS12,P3L,hFib2,hFiPS                     |
| <b>NR_004846</b>    | 13                       | P1F,P1iPS11,IMR90,IMR90iPS,H12,BJ,P9L,H63,H42,Hy,BjiPS12,P3L,BjiPS11                 |
| <b>JPH2</b>         | 12                       | P1F,P1iPS11,IMR90,H12,BJ,P9L,H42,Hy,P3L,hFib2,hFiPS,P1L                              |
| <b>C20orf96</b>     | 12                       | P1F,P1iPS11,H12,BJ,P9L,H63,H42,BjiPS12,P3L,hFib2,BjiPS11,P1L                         |
| <b>TXNRD1</b>       | 12                       | P1F,P1iPS11,IMR90,IMR90iPS,H12,BJ,P9L,H63,BjiPS12,P3L,BjiPS11,P1L                    |
| <b>THBD</b>         | 12                       | P1F,P1iPS11,IMR90,IMR90iPS,H12,P9L,H63,Hy,hFib2,BjiPS11,hFiPS,P1L                    |
| <b>KRT86</b>        | 12                       | P1F,P1iPS11,IMR90iPS,H12,BJ,P9L,Hy,BjiPS12,hFib2,BjiPS11,hFiPS,P1L                   |
| <b>KCNQ2</b>        | 12                       | P1F,P1iPS11,IMR90,BJ,P9L,Hy,BjiPS12,P3L,hFib2,BjiPS11,hFiPS,P1L                      |
| <b>CACNA2D4</b>     | 12                       | P1iPS11,IMR90,IMR90iPS,H12,P9L,H63,H42,Hy,P3L,hFib2,hFiPS,P1L                        |
| <b>TBX3</b>         | 12                       | P1F,P1iPS11,H12,P9L,H63,H42,Hy,BjiPS12,P3L,hFib2,BjiPS11,P1L                         |

**Supplementary Table 4.** Genes with Conserved LD Blocks across 12 or more cell lines. These genes contain CpG dinucleotides that are strong candidates for biological regulation via methylation. Cell line names are abbreviated so that they can be printed on a single line.

**Supplementary Table 5.** SNP calling statistics.

| Cell Line | Total<br>Candidate SNP<br>Sites Examined | Called<br>Heterozygous<br>SNPs | Heterogzyous<br>SNP Call<br>Percentage | Called<br>Homozygous<br>SNPs | Homozygous<br>SNP Call<br>Percentage |
|-----------|------------------------------------------|--------------------------------|----------------------------------------|------------------------------|--------------------------------------|
| BJ        | 1,525,138                                | 457                            | 0.030%                                 | 391                          | 0.026%                               |
| BJ-iPS11  | 1,123,678                                | 381                            | 0.034%                                 | 260                          | 0.023%                               |
| BJ-iPS12  | 1,192,417                                | 402                            | 0.034%                                 | 273                          | 0.023%                               |
| hFib2     | 1,350,920                                | 279                            | 0.021%                                 | 307                          | 0.023%                               |
| hFib2-iPS | 1,144,060                                | 283                            | 0.025%                                 | 233                          | 0.020%                               |
| Hues12    | 1,348,641                                | 391                            | 0.029%                                 | 344                          | 0.026%                               |
| Hues42    | 1,128,168                                | 308                            | 0.027%                                 | 283                          | 0.025%                               |
| Hues63    | 1,178,908                                | 382                            | 0.032%                                 | 197                          | 0.017%                               |
| Hybrid1   | 1,390,831                                | 395                            | 0.028%                                 | 199                          | 0.014%                               |
| IMR90     | 1,434,099                                | 436                            | 0.030%                                 | 334                          | 0.023%                               |
| IMR90-iPS | 1,139,705                                | 430                            | 0.038%                                 | 260                          | 0.023%                               |
| PGP1F     | 1,020,601                                | 292                            | 0.029%                                 | 253                          | 0.025%                               |
| PGP1-iPS1 | 835,010                                  | 240                            | 0.029%                                 | 204                          | 0.024%                               |
| PGP1L     | 913,151                                  | 257                            | 0.028%                                 | 227                          | 0.025%                               |
| PGP3L     | 951,308                                  | 254                            | 0.027%                                 | 240                          | 0.025%                               |
| PGP9L     | 982,170                                  | 272                            | 0.028%                                 | 236                          | 0.024%                               |

**Supplementary Table 5.** SNP calling statistics. Candidate sites include all chromosomal locations with sufficient read coverage (minimum 10x coverage on analyzed strands) and sequence quality. Double stranded sites were checked for reverse complementarity. SNP calls were filtered so that only SNP calls made at rs129 sites that matched the reported SNP bases were recorded.

**Supplementary Table 6.** Pairwise common heterozygous SNPs between cell lines.

| Cell Line        | BJ  | BJ-<br>iPS1<br>1 | BJ-<br>iPS1<br>2 | hFib<br>2 | hFib<br>2-<br>iPS | Hue<br>s12 | Hue<br>s42 | Hue<br>s63 | Hyb<br>rid1 | IMR<br>90 | IMR<br>90-<br>iPS | PG<br>P1F | PG<br>P1-<br>iPS<br>1 | PGP<br>1L | PG<br>P3L | PG<br>P9L |
|------------------|-----|------------------|------------------|-----------|-------------------|------------|------------|------------|-------------|-----------|-------------------|-----------|-----------------------|-----------|-----------|-----------|
| <b>BJ</b>        | 502 | 369              | 378              | 114       | 111               | 152        | 102        | 144        | 219         | 149       | 150               | 113       | 94                    | 97        | 104       | 120       |
| <b>BJ-iPS11</b>  | 369 | 421              | 366              | 115       | 116               | 140        | 95         | 136        | 229         | 128       | 137               | 99        | 84                    | 85        | 97        | 117       |
| <b>BJ-iPS12</b>  | 378 | 366              | 450              | 111       | 117               | 152        | 104        | 138        | 230         | 141       | 154               | 100       | 95                    | 89        | 96        | 124       |
| <b>hFib2</b>     | 114 | 115              | 111              | 305       | 241               | 116        | 81         | 98         | 127         | 121       | 122               | 89        | 74                    | 70        | 85        | 87        |
| <b>hFib2-iPS</b> | 111 | 116              | 117              | 241       | 296               | 119        | 79         | 94         | 126         | 120       | 119               | 81        | 73                    | 68        | 80        | 82        |
| <b>Hues12</b>    | 152 | 140              | 152              | 116       | 119               | 427        | 110        | 119        | 137         | 138       | 123               | 105       | 90                    | 96        | 99        | 98        |
| <b>Hues42</b>    | 102 | 95               | 104              | 81        | 79                | 110        | 341        | 101        | 116         | 100       | 99                | 97        | 85                    | 84        | 79        | 93        |
| <b>Hues63</b>    | 144 | 136              | 138              | 98        | 94                | 119        | 101        | 417        | 129         | 134       | 134               | 107       | 86                    | 94        | 92        | 85        |
| <b>Hybrid1</b>   | 219 | 229              | 230              | 127       | 126               | 137        | 116        | 129        | 412         | 135       | 147               | 120       | 104                   | 109       | 120       | 125       |
| <b>IMR90</b>     | 149 | 128              | 141              | 121       | 120               | 138        | 100        | 134        | 135         | 490       | 360               | 111       | 101                   | 102       | 101       | 101       |
| <b>IMR90-iPS</b> | 150 | 137              | 154              | 122       | 119               | 123        | 99         | 134        | 147         | 360       | 493               | 109       | 97                    | 97        | 100       | 105       |
| <b>PGP1F</b>     | 113 | 99               | 100              | 89        | 81                | 105        | 97         | 107        | 120         | 111       | 109               | 322       | 222                   | 231       | 85        | 82        |
| <b>PGP1-iPS1</b> | 94  | 84               | 95               | 74        | 73                | 90         | 85         | 86         | 104         | 101       | 97                | 222       | 266                   | 223       | 71        | 73        |
| <b>PGP1L</b>     | 97  | 85               | 89               | 70        | 68                | 96         | 84         | 94         | 109         | 102       | 97                | 231       | 223                   | 290       | 79        | 80        |
| <b>PGP3L</b>     | 104 | 97               | 96               | 85        | 80                | 99         | 79         | 92         | 120         | 101       | 100               | 85        | 71                    | 79        | 272       | 89        |
| <b>PGP9L</b>     | 120 | 117              | 124              | 87        | 82                | 98         | 93         | 85         | 125         | 101       | 105               | 82        | 73                    | 80        | 89        | 288       |

**Supplementary Table 5.** Pairwise common heterozygous SNPs between cell lines. Each matrix entry represents the number of heterozygous SNPs called in the row i cell line that match with those called in the column j cell line.

**Supplementary Table 7.** Pairwise common homozygous SNPs between cell lines.

| Cell Line        | BJ  | BJ-<br>iPS1 | BJ-<br>iPS1 | hFib<br>2 | hFib<br>2-<br>iPS | Hue<br>s12 | Hue<br>s42 | Hue<br>s63 | Hyb<br>rid_<br>1 | IMR<br>90 | IMR<br>90-<br>iPS | PGP<br>1F | PGP<br>1-<br>iPS1 | PGP<br>1L | PGP<br>3L | PGP<br>9L |
|------------------|-----|-------------|-------------|-----------|-------------------|------------|------------|------------|------------------|-----------|-------------------|-----------|-------------------|-----------|-----------|-----------|
| <b>BJ</b>        | 391 | 248         | 259         | 121       | 119               | 159        | 122        | 137        | 165              | 155       | 141               | 143       | 121               | 129       | 130       | 132       |
| <b>BJ-iPS11</b>  | 248 | 260         | 229         | 106       | 107               | 129        | 105        | 118        | 140              | 114       | 123               | 124       | 103               | 108       | 114       | 114       |
| <b>BJ-iPS12</b>  | 259 | 229         | 273         | 104       | 105               | 140        | 112        | 118        | 137              | 120       | 125               | 120       | 104               | 115       | 114       | 117       |
| <b>hFib2</b>     | 121 | 106         | 104         | 307       | 170               | 127        | 114        | 95         | 101              | 114       | 92                | 120       | 108               | 110       | 125       | 115       |
| <b>hFib2-iPS</b> | 119 | 107         | 105         | 170       | 233               | 119        | 111        | 87         | 97               | 105       | 98                | 114       | 104               | 105       | 115       | 111       |
| <b>Hues12</b>    | 159 | 129         | 140         | 127       | 119               | 344        | 155        | 111        | 102              | 137       | 129               | 145       | 122               | 139       | 140       | 143       |
| <b>Hues42</b>    | 122 | 105         | 112         | 114       | 111               | 155        | 283        | 101        | 93               | 121       | 111               | 147       | 121               | 128       | 119       | 123       |
| <b>Hues63</b>    | 137 | 118         | 118         | 95        | 87                | 111        | 101        | 197        | 106              | 117       | 116               | 108       | 88                | 92        | 104       | 99        |
| <b>Hybrid1</b>   | 165 | 140         | 137         | 101       | 97                | 102        | 93         | 106        | 199              | 116       | 109               | 101       | 94                | 87        | 94        | 93        |
| <b>IMR90</b>     | 155 | 114         | 120         | 114       | 105               | 137        | 121        | 117        | 116              | 334       | 208               | 128       | 117               | 113       | 116       | 129       |
| <b>IMR90-iPS</b> | 141 | 123         | 125         | 92        | 98                | 129        | 111        | 116        | 109              | 208       | 260               | 118       | 104               | 105       | 100       | 118       |
| <b>PGP1F</b>     | 143 | 124         | 120         | 120       | 114               | 145        | 147        | 108        | 101              | 128       | 118               | 253       | 183               | 186       | 121       | 129       |
| <b>PGP1-iPS1</b> | 121 | 103         | 104         | 108       | 104               | 122        | 121        | 88         | 94               | 117       | 104               | 183       | 204               | 173       | 113       | 114       |
| <b>PGP1L</b>     | 129 | 108         | 115         | 110       | 105               | 139        | 128        | 92         | 87               | 113       | 105               | 186       | 173               | 227       | 114       | 114       |
| <b>PGP3L</b>     | 130 | 114         | 114         | 125       | 115               | 140        | 119        | 104        | 94               | 116       | 100               | 121       | 113               | 114       | 240       | 127       |
| <b>PGP9L</b>     | 132 | 114         | 117         | 115       | 111               | 143        | 123        | 99         | 93               | 129       | 118               | 129       | 114               | 114       | 127       | 236       |

**Supplementary Table 6.** Pairwise common homozygous SNPs between cell lines. Each matrix entry represents the number of homozygous SNPs called in the row i cell line that match with those called in the column j cell line.
